# Supplementary material for: FOXR2 Is an Epigenetically Regulated Pan-Cancer Oncogene That Activates ETS Transcriptional Circuits
Source: PubMed Central journal article supplement — Cancer Res. 2022 Jul 8;82(17):2980–3001. doi: 10.1158/0008-5472.CAN-22-0671 (PMC9437574; doi:10.1158/0008-5472.can-22-0671), 2022-07-08

Supplemental Figure 1

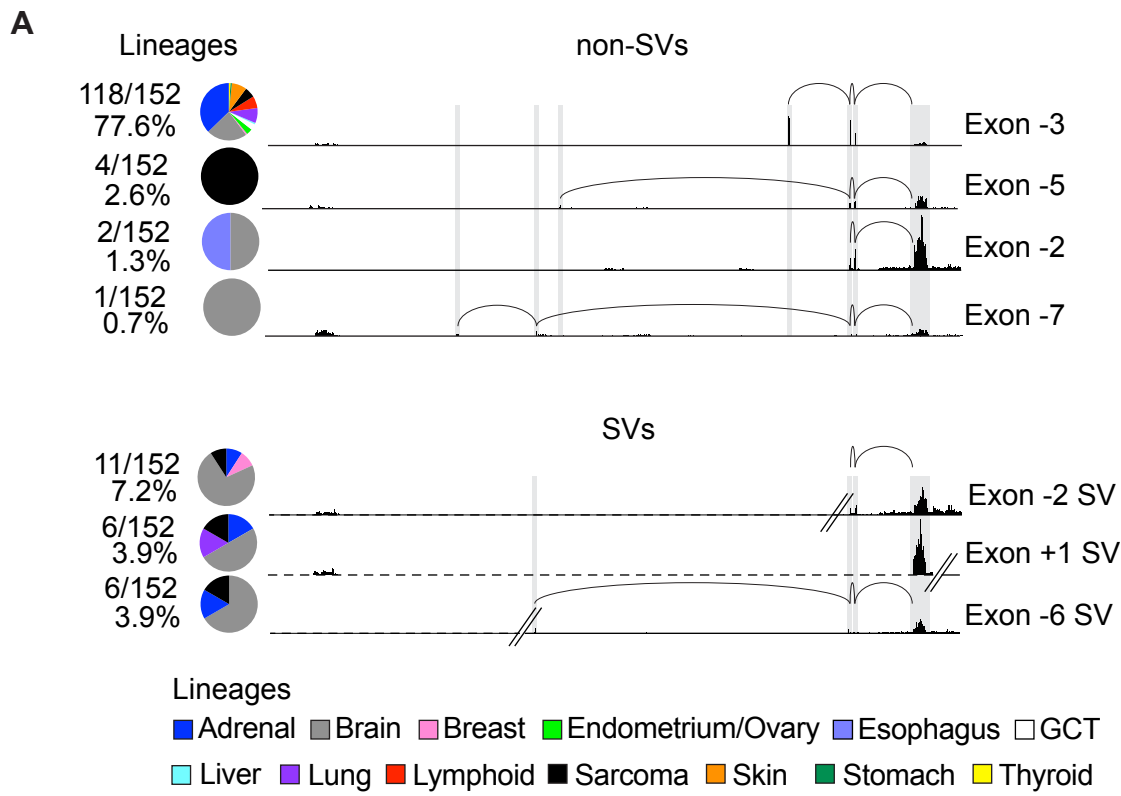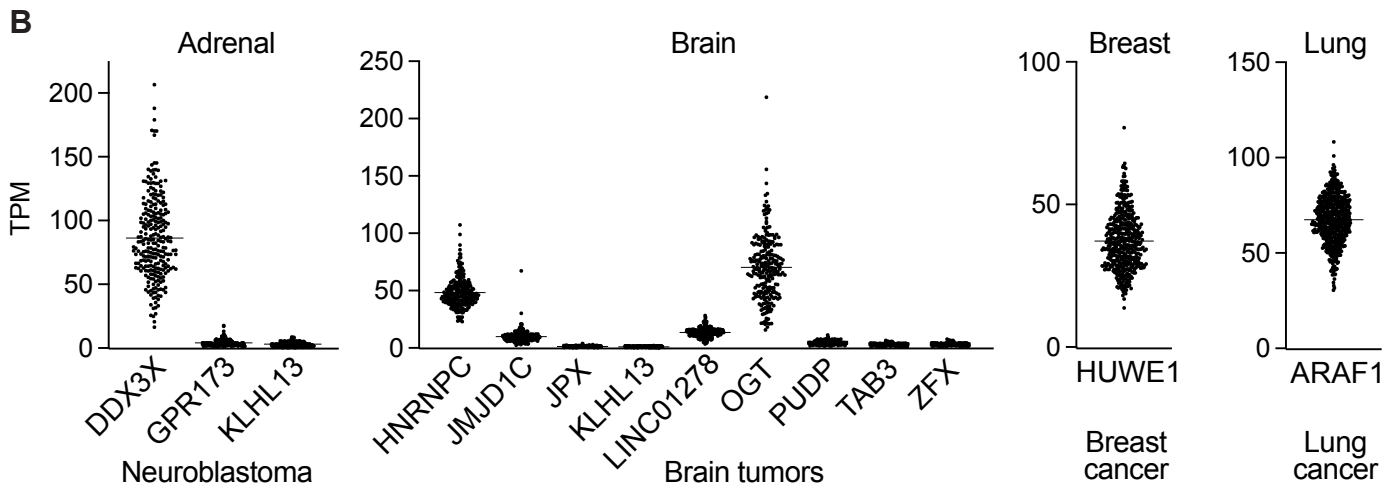

Supplement: can-22-0671_supplemental_figure_1_suppsf1.pdf [file can-22-0671_supplemental_figure_1_suppsf1.pdf]
